# Supplementary material
Source: MDPI journal article supplement (https://www.mdpi.com/2077-0472/12/6/806)
Supplement: s1 [file s1]

**Table S1** The primers used in this study

| Primer name | Primer sequence (5' to 3')           | Purpose                                            |
|-------------|--------------------------------------|----------------------------------------------------|
| BJFg++      | ggcaCGTTGCTGGCGATCGA                 | Primers for CRISPR/Cas9 vector construction        |
| BJFg--      | aaacTCGATCGCCAGCAACG                 |                                                    |
| BJGg++      | ggcaCAACGTCGAGACCGGC                 | Primers for CRISPR/Cas9 vector construction        |
| BJGg--      | aaacGCCGGTCTCGACGTTG                 |                                                    |
| BjfF        | CTCCATCCACAAACCCTCCT                 | Primers for detection of BJF target site in CY84   |
| BjfR        | TTCCTGATCTTCCCCTGCAG                 |                                                    |
| BjgF        | CGCCAACAACCCGGTAACTA                 | Primers for detection of BJG target site in CY84   |
| BjgR        | CCCCATGTCCGCTAGAAAGG                 |                                                    |
| Hi-BJFf     | ggagtgagtacggtgtgcTGCAGCACGAGGGCGATG | Detection of BJF target site in hybrid seeds       |
| Hi-BJFr     | gagttggtgctggtggGGGATGAGGCCCTGATG    |                                                    |
| Hi-BJGf     | ggagtgagtacggtgtgcCAGGGACAACATGCGGGC | Detection of BJG target site in hybrid seeds       |
| Hi-BJGr     | gagttggtgctggtggGGGCACCTCGACGTACCT   |                                                    |
| Csa9F       | CCTAAGAAGAAGAGAAAGGTCG               | Primers for detection of <i>Cas9</i> element       |
| Cas9R       | GCAGATGATAGATTGTGGGGTA               |                                                    |
| HygF        | CTTTGCCCTCGGACGAGTGCTG               | Primers for detection of <i>hygromycin</i> element |
| HygR        | GTATATGCTCCGCATTGGTCTT               |                                                    |
